# Supplementary material for: Detection of the inferred interaction network in hepatocellular carcinoma from EHCO (E ncyclopedia of H epatocellular C arcinoma genes O nline)
Source: Springer Nature journal article supplement (doi:10.1186/1471-2105-8-66), 2007-02-27

(A)

|                | PubMed        | SAGE       | GIS       | Lee_NIH       | Kim_NIH       | TableX_mRNA       | TableX_protein       | Distinct genes |
|----------------|---------------|------------|-----------|---------------|---------------|-------------------|----------------------|----------------|
| SMD1648 (1161) | 138           | 104        | 61        | 75            | 66            | 115               | 25                   | 790 (68.0%)    |
|                | PubMed (1084) | 75         | 29        | 69            | 48            | 123               | 33                   | 754 (69.6%)    |
|                |               | SAGE (391) | 10        | 33            | 38            | 74                | 26                   | 185 (47.3%)    |
|                |               |            | GIS (199) | 16            | 9             | 34                | 8                    | 94 (47.2%)     |
|                |               |            |           | Lee_NIH (314) | 20            | 36                | 14                   | 144 (45.9%)    |
|                |               |            |           |               | Kim_NIH (224) | 36                | 8                    | 102 (45.5%)    |
|                |               |            |           |               |               | TableX_mRNA (385) | 26                   | 138 (35.8%)    |
|                |               |            |           |               |               |                   | TableX_protein (104) | 34 (32.7%)     |

(B)

| Frequency | Gene Count   |
|-----------|--------------|
| 1         | 2243 (77.2%) |
| 2         | 450 (15.5%)  |
| 3         | 151 (5.2%)   |
| 4         | 46 (1.6%)    |
| 5         | 14 (0.5%)    |
| 6         | 2 (0.1%)     |

(C)

| KEGG Pathway Analysis                  | Gene Count |
|----------------------------------------|------------|
| Cytokine-cytokine receptor interaction | 102        |
| MAPK signaling pathway                 | 88         |
| Focal adhesion                         | 75         |
| Jak-STAT signaling pathway             | 61         |
| Regulation of actin cytoskeleton       | 54         |

(D)

| BioCarta Pathway Analysis                                                  | Gene Count |
|----------------------------------------------------------------------------|------------|
| MAPKinase Signaling Pathway                                                | 38         |
| HIV-1 Nef: negative effector of Fas and TNF                                | 33         |
| Mechanism of Gene Regulation by Peroxisome Proliferators via PPAR $\alpha$ | 29         |
| Keratinocyte Differentiation                                               | 26         |
| Nuclear Receptors in Lipid Metabolism and Toxicity                         | 24         |

(E)

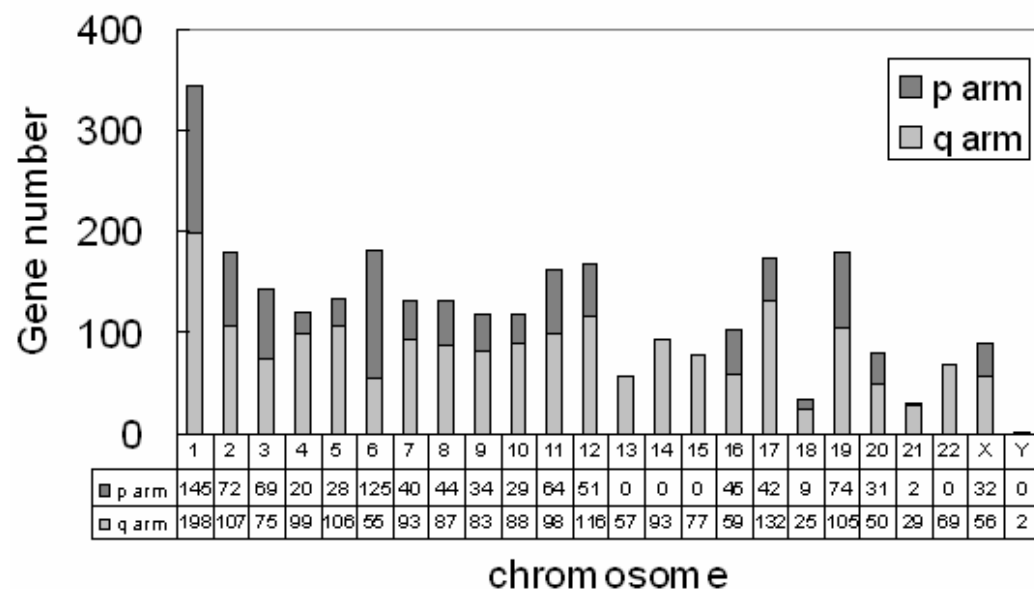

Supplement: 12859_2006_1438_MOESM2_ESM.pdf [file 12859_2006_1438_MOESM2_ESM.pdf]
