# Supplementary material for: Detection of the inferred interaction network in hepatocellular carcinoma from EHCO (E ncyclopedia of H epatocellular C arcinoma genes O nline)
Source: Springer Nature journal article supplement (doi:10.1186/1471-2105-8-66), 2007-02-27

(A)

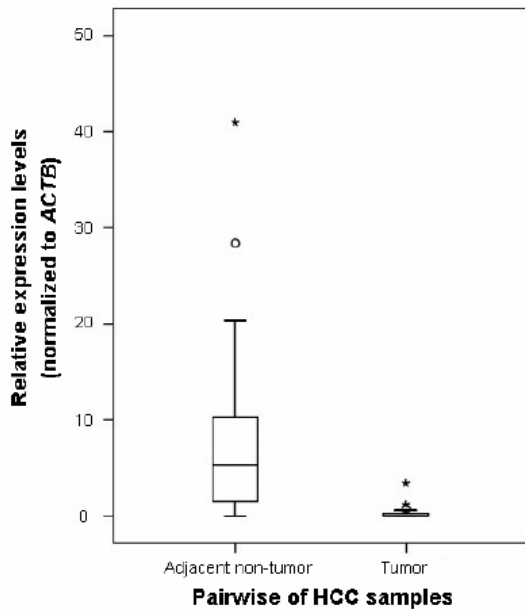

(B)

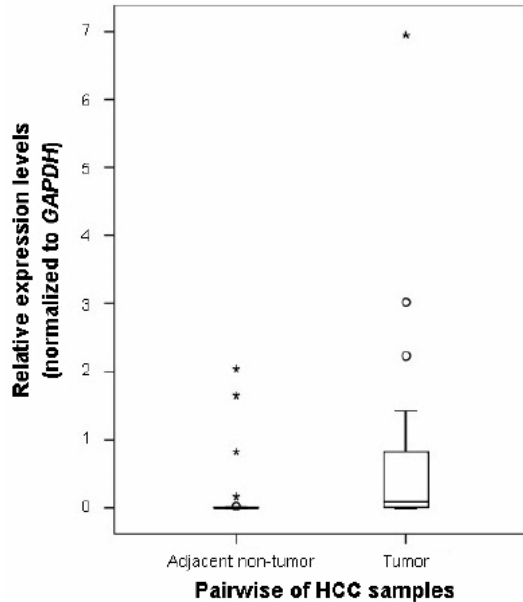

Supplement: 12859_2006_1438_MOESM3_ESM.pdf [file 12859_2006_1438_MOESM3_ESM.pdf]
