# Supplementary material for: Detection of the inferred interaction network in hepatocellular carcinoma from EHCO (E ncyclopedia of H epatocellular C arcinoma genes O nline)
Source: Springer Nature journal article supplement (doi:10.1186/1471-2105-8-66), 2007-02-27

(A)

| GO (Molecular function) | Percentage |
|-------------------------|------------|
| Protein Binding         | 24%        |
| Ion Binding             | 14%        |
| Nucleic Acid Binding    | 13%        |
| Hydrolase Activity      | 10%        |
| Nucleotide Binding      | 10%        |

(B)

| GO (Biological process)             | Percentage |
|-------------------------------------|------------|
| Cellular Physiological Process      | 27%        |
| Metabolism                          | 21%        |
| Regulation of Cellular Process      | 9%         |
| Regulation of Physiological Process | 9%         |
| Cell Communication                  | 8%         |

(C)

|                                             | GIS   | Lee_NIH | Kim_NIH | SMD1648 | SAGE  | EHCO conserved |
|---------------------------------------------|-------|---------|---------|---------|-------|----------------|
|                                             | up    | up      | up      | up      | up    | up             |
| query                                       | 161   | 161     | 46      | 463     | 112   | 139            |
| no PPI information                          | 22    | 12      | 14      | 102     | 44    | 19             |
| # of query forms PPI                        | 45    | 52      | 4       | 128     | 7     | 47             |
| query also hub                              | 28    | 29      | 2       | 81      | 2     | 18             |
| query query PPIs                            | 55    | 62      | 4       | 180     | 5     | 48             |
| ratio of query forms PPI out of total query | 32.4% | 34.9%   | 12.5%   | 35.5%   | 10.3% | 39.2%          |

(D)

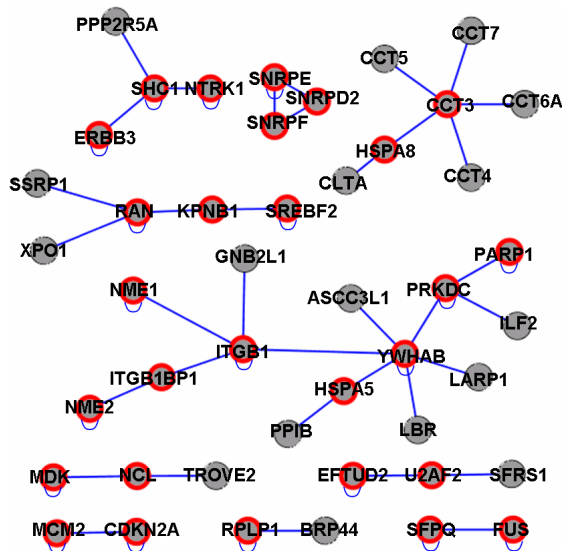

(E)

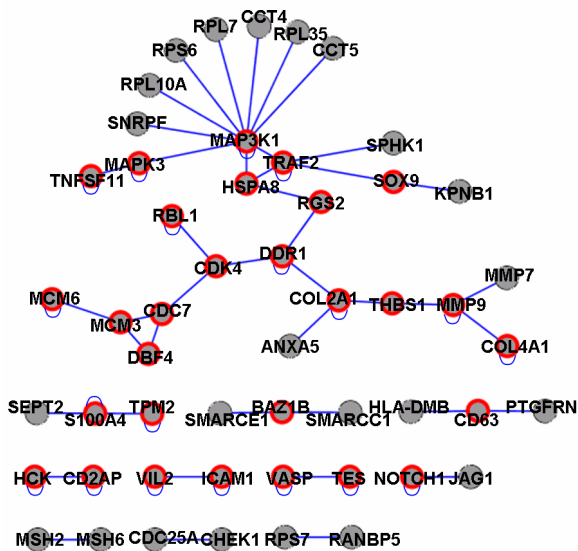

Supplement: 12859_2006_1438_MOESM4_ESM.pdf [file 12859_2006_1438_MOESM4_ESM.pdf]
